# Supplementary material for: Development of an Affordable, Sustainable and Efficacious Plant-Based Immunomodulatory Food Ingredient Based on Bell Pepper or Carrot RG-I Pectic Polysaccharides
Source: PubMed Central journal article supplement (PMC8002328; doi:10.3390/nu13030963), 2021-03-16
Supplement: nutrients-13-00963-s001.pdf [file nutrients-13-00963-s001.pdf]

## Supplemental material

**Running title:** The development of an affordable, sustainable and efficacious plant-based immunomodulatory food ingredient based on bell pepper or carrot RG-I pectic polysaccharides

**Supplemental table S1.** Extraction yield and MW distribution of bell pepper-PS and carrot-PS after extraction in hot water (100°C, 90 min) and bicarbonate (pH 7.5-8, 100°C, 90 min).

| material       | extraction         | Extraction yield (wt%) | Mw distribution |                  |                 |               |
|----------------|--------------------|------------------------|-----------------|------------------|-----------------|---------------|
|                |                    |                        | >110 kDa (wt%)  | 70-110 kDa (wt%) | 40-70 kDa (wt%) | <40 kDa (wt%) |
| bell pepper-PS | water              | 9                      | 12              | 16               | 21              | 51            |
|                | NaHCO <sub>3</sub> | 12                     | 18              | 13               | 27              | 42            |
| carrot-PS      | water              | 9                      | 9               | 16               | 22              | 53            |
|                | NaHCO <sub>3</sub> | 20                     | 33              | 23               | 17              | 27            |

MW fractions corresponding to >110 kDa, 70-110 kDa and 40-70 kDa were collected and extraction yields measured. The remainder fraction was considered to have a MW <40 kDa.

**Supplemental table S2.** Secretome of in vitro whole blood assay.

|              | GM-CSF (pg/mL) | IFN- $\gamma$ (pg/mL) | IL-1 (pg/mL) | IL-2 (pg/mL) | IL-3 (pg/mL) | IL-4 (pg/mL) | IL-5 (pg/mL) | IL-6 (pg/mL) | IL-7 (pg/mL) | IL-8 (pg/mL) | IL-9 (pg/mL) | IL-10 (pg/mL) | IL-12 (pg/mL) | IL-13 (pg/mL) | IL-15 (pg/mL) | IL-17 (pg/mL) | IL-18 (pg/mL) | IL-21 (pg/mL) | IL-23 (pg/mL) | IL-27 (pg/mL) | IL-31 (pg/mL) | IL-33 (pg/mL) | IL-35 (pg/mL) | IL-36 (pg/mL) | IL-37 (pg/mL) | IL-38 (pg/mL) | IL-39 (pg/mL) | IL-40 (pg/mL) | IL-41 (pg/mL) | IL-42 (pg/mL) | IL-43 (pg/mL) | IL-44 (pg/mL) | IL-45 (pg/mL) | IL-46 (pg/mL) | IL-47 (pg/mL) | IL-48 (pg/mL) | IL-49 (pg/mL) | IL-50 (pg/mL) | IL-51 (pg/mL) | IL-52 (pg/mL) | IL-53 (pg/mL) | IL-54 (pg/mL) | IL-55 (pg/mL) | IL-56 (pg/mL) | IL-57 (pg/mL) | IL-58 (pg/mL) | IL-59 (pg/mL) | IL-60 (pg/mL) | IL-61 (pg/mL) | IL-62 (pg/mL) | IL-63 (pg/mL) | IL-64 (pg/mL) | IL-65 (pg/mL) | IL-66 (pg/mL) | IL-67 (pg/mL) | IL-68 (pg/mL) | IL-69 (pg/mL) | IL-70 (pg/mL) | IL-71 (pg/mL) | IL-72 (pg/mL) | IL-73 (pg/mL) | IL-74 (pg/mL) | IL-75 (pg/mL) | IL-76 (pg/mL) | IL-77 (pg/mL) | IL-78 (pg/mL) | IL-79 (pg/mL) | IL-80 (pg/mL) | IL-81 (pg/mL) | IL-82 (pg/mL) | IL-83 (pg/mL) | IL-84 (pg/mL) | IL-85 (pg/mL) | IL-86 (pg/mL) | IL-87 (pg/mL) | IL-88 (pg/mL) | IL-89 (pg/mL) | IL-90 (pg/mL) | IL-91 (pg/mL) | IL-92 (pg/mL) | IL-93 (pg/mL) | IL-94 (pg/mL) | IL-95 (pg/mL) | IL-96 (pg/mL) | IL-97 (pg/mL) | IL-98 (pg/mL) | IL-99 (pg/mL) | IL-100 (pg/mL) | IL-101 (pg/mL) | IL-102 (pg/mL) | IL-103 (pg/mL) | IL-104 (pg/mL) | IL-105 (pg/mL) | IL-106 (pg/mL) | IL-107 (pg/mL) | IL-108 (pg/mL) | IL-109 (pg/mL) | IL-110 (pg/mL) | IL-111 (pg/mL) | IL-112 (pg/mL) | IL-113 (pg/mL) | IL-114 (pg/mL) | IL-115 (pg/mL) | IL-116 (pg/mL) | IL-117 (pg/mL) | IL-118 (pg/mL) | IL-119 (pg/mL) | IL-120 (pg/mL) | IL-121 (pg/mL) | IL-122 (pg/mL) | IL-123 (pg/mL) | IL-124 (pg/mL) | IL-125 (pg/mL) | IL-126 (pg/mL) | IL-127 (pg/mL) | IL-128 (pg/mL) | IL-129 (pg/mL) | IL-130 (pg/mL) | IL-131 (pg/mL) | IL-132 (pg/mL) | IL-133 (pg/mL) | IL-134 (pg/mL) | IL-135 (pg/mL) | IL-136 (pg/mL) | IL-137 (pg/mL) | IL-138 (pg/mL) | IL-139 (pg/mL) | IL-140 (pg/mL) | IL-141 (pg/mL) | IL-142 (pg/mL) | IL-143 (pg/mL) | IL-144 (pg/mL) | IL-145 (pg/mL) | IL-146 (pg/mL) | IL-147 (pg/mL) | IL-148 (pg/mL) | IL-149 (pg/mL) | IL-150 (pg/mL) | IL-151 (pg/mL) | IL-152 (pg/mL) | IL-153 (pg/mL) | IL-154 (pg/mL) | IL-155 (pg/mL) | IL-156 (pg/mL) | IL-157 (pg/mL) | IL-158 (pg/mL) | IL-159 (pg/mL) | IL-160 (pg/mL) | IL-161 (pg/mL) | IL-162 (pg/mL) | IL-163 (pg/mL) | IL-164 (pg/mL) | IL-165 (pg/mL) | IL-166 (pg/mL) | IL-167 (pg/mL) | IL-168 (pg/mL) | IL-169 (pg/mL) | IL-170 (pg/mL) | IL-171 (pg/mL) | IL-172 (pg/mL) | IL-173 (pg/mL) | IL-174 (pg/mL) | IL-175 (pg/mL) | IL-176 (pg/mL) | IL-177 (pg/mL) | IL-178 (pg/mL) | IL-179 (pg/mL) | IL-180 (pg/mL) | IL-181 (pg/mL) | IL-182 (pg/mL) | IL-183 (pg/mL) | IL-184 (pg/mL) | IL-185 (pg/mL) | IL-186 (pg/mL) | IL-187 (pg/mL) | IL-188 (pg/mL) | IL-189 (pg/mL) | IL-190 (pg/mL) | IL-191 (pg/mL) | IL-192 (pg/mL) | IL-193 (pg/mL) | IL-194 (pg/mL) | IL-195 (pg/mL) | IL-196 (pg/mL) | IL-197 (pg/mL) | IL-198 (pg/mL) | IL-199 (pg/mL) | IL-200 (pg/mL) | IL-201 (pg/mL) | IL-202 (pg/mL) | IL-203 (pg/mL) | IL-204 (pg/mL) | IL-205 (pg/mL) | IL-206 (pg/mL) | IL-207 (pg/mL) | IL-208 (pg/mL) | IL-209 (pg/mL) | IL-210 (pg/mL) | IL-211 (pg/mL) | IL-212 (pg/mL) | IL-213 (pg/mL) | IL-214 (pg/mL) | IL-215 (pg/mL) | IL-216 (pg/mL) | IL-217 (pg/mL) | IL-218 (pg/mL) | IL-219 (pg/mL) | IL-220 (pg/mL) | IL-221 (pg/mL) | IL-222 (pg/mL) | IL-223 (pg/mL) | IL-224 (pg/mL) | IL-225 (pg/mL) | IL-226 (pg/mL) | IL-227 (pg/mL) | IL-228 (pg/mL) | IL-229 (pg/mL) | IL-230 (pg/mL) | IL-231 (pg/mL) | IL-232 (pg/mL) | IL-233 (pg/mL) | IL-234 (pg/mL) | IL-235 (pg/mL) | IL-236 (pg/mL) | IL-237 (pg/mL) | IL-238 (pg/mL) | IL-239 (pg/mL) | IL-240 (pg/mL) | IL-241 (pg/mL) | IL-242 (pg/mL) | IL-243 (pg/mL) | IL-244 (pg/mL) | IL-245 (pg/mL) | IL-246 (pg/mL) | IL-247 (pg/mL) | IL-248 (pg/mL) | IL-249 (pg/mL) | IL-250 (pg/mL) | IL-251 (pg/mL) | IL-252 (pg/mL) | IL-253 (pg/mL) | IL-254 (pg/mL) | IL-255 (pg/mL) | IL-256 (pg/mL) | IL-257 (pg/mL) | IL-258 (pg/mL) | IL-259 (pg/mL) | IL-260 (pg/mL) | IL-261 (pg/mL) | IL-262 (pg/mL) | IL-263 (pg/mL) | IL-264 (pg/mL) | IL-265 (pg/mL) | IL-266 (pg/mL) | IL-267 (pg/mL) | IL-268 (pg/mL) | IL-269 (pg/mL) | IL-270 (pg/mL) | IL-271 (pg/mL) | IL-272 (pg/mL) | IL-273 (pg/mL) | IL-274 (pg/mL) | IL-275 (pg/mL) | IL-276 (pg/mL) | IL-277 (pg/mL) | IL-278 (pg/mL) | IL-279 (pg/mL) | IL-280 (pg/mL) | IL-281 (pg/mL) | IL-282 (pg/mL) | IL-283 (pg/mL) | IL-284 (pg/mL) | IL-285 (pg/mL) | IL-286 (pg/mL) | IL-287 (pg/mL) | IL-288 (pg/mL) | IL-289 (pg/mL) | IL-290 (pg/mL) | IL-291 (pg/mL) | IL-292 (pg/mL) | IL-293 (pg/mL) | IL-294 (pg/mL) | IL-295 (pg/mL) | IL-296 (pg/mL) | IL-297 (pg/mL) | IL-298 (pg/mL) | IL-299 (pg/mL) | IL-300 (pg/mL) | IL-301 (pg/mL) | IL-302 (pg/mL) | IL-303 (pg/mL) | IL-304 (pg/mL) | IL-305 (pg/mL) | IL-306 (pg/mL) | IL-307 (pg/mL) | IL-308 (pg/mL) | IL-309 (pg/mL) | IL-310 (pg/mL) | IL-311 (pg/mL) | IL-312 (pg/mL) | IL-313 (pg/mL) | IL-314 (pg/mL) | IL-315 (pg/mL) | IL-316 (pg/mL) | IL-317 (pg/mL) | IL-318 (pg/mL) | IL-319 (pg/mL) | IL-320 (pg/mL) | IL-321 (pg/mL) | IL-322 (pg/mL) | IL-323 (pg/mL) | IL-324 (pg/mL) | IL-325 (pg/mL) | IL-326 (pg/mL) | IL-327 (pg/mL) | IL-328 (pg/mL) | IL-329 (pg/mL) | IL-330 (pg/mL) | IL-331 (pg/mL) | IL-332 (pg/mL) | IL-333 (pg/mL) | IL-334 (pg/mL) | IL-335 (pg/mL) | IL-336 (pg/mL) | IL-337 (pg/mL) | IL-338 (pg/mL) | IL-339 (pg/mL) | IL-340 (pg/mL) | IL-341 (pg/mL) | IL-342 (pg/mL) | IL-343 (pg/mL) | IL-344 (pg/mL) | IL-345 (pg/mL) | IL-346 (pg/mL) | IL-347 (pg/mL) | IL-348 (pg/mL) | IL-349 (pg/mL) | IL-350 (pg/mL) | IL-351 (pg/mL) | IL-352 (pg/mL) | IL-353 (pg/mL) | IL-354 (pg/mL) | IL-355 (pg/mL) | IL-356 (pg/mL) | IL-357 (pg/mL) | IL-358 (pg/mL) | IL-359 (pg/mL) | IL-360 (pg/mL) | IL-361 (pg/mL) | IL-362 (pg/mL) | IL-363 (pg/mL) | IL-364 (pg/mL) | IL-365 (pg/mL) | IL-366 (pg/mL) | IL-367 (pg/mL) | IL-368 (pg/mL) | IL-369 (pg/mL) | IL-370 (pg/mL) | IL-371 (pg/mL) | IL-372 (pg/mL) | IL-373 (pg/mL) | IL-374 (pg/mL) | IL-375 (pg/mL) | IL-376 (pg/mL) | IL-377 (pg/mL) | IL-378 (pg/mL) | IL-379 (pg/mL) | IL-380 (pg/mL) | IL-381 (pg/mL) | IL-382 (pg/mL) | IL-383 (pg/mL) | IL-384 (pg/mL) | IL-385 (pg/mL) | IL-386 (pg/mL) | IL-387 (pg/mL) | IL-388 (pg/mL) | IL-389 (pg/mL) | IL-390 (pg/mL) | IL-391 (pg/mL) | IL-392 (pg/mL) | IL-393 (pg/mL) | IL-394 (pg/mL) | IL-395 (pg/mL) | IL-396 (pg/mL) | IL-397 (pg/mL) | IL-398 (pg/mL) | IL-399 (pg/mL) | IL-400 (pg/mL) | IL-401 (pg/mL) | IL-402 (pg/mL) | IL-403 (pg/mL) | IL-404 (pg/mL) | IL-405 (pg/mL) | IL-406 (pg/mL) | IL-407 (pg/mL) | IL-408 (pg/mL) | IL-409 (pg/mL) | IL-410 (pg/mL) | IL-411 (pg/mL) | IL-412 (pg/mL) | IL-413 (pg/mL) | IL-414 (pg/mL) | IL-415 (pg/mL) | IL-416 (pg/mL) | IL-417 (pg/mL) | IL-418 (pg/mL) | IL-419 (pg/mL) | IL-420 (pg/mL) | IL-421 (pg/mL) | IL-422 (pg/mL) | IL-423 (pg/mL) | IL-424 (pg/mL) | IL-425 (pg/mL) | IL-426 (pg/mL) | IL-427 (pg/mL) | IL-428 (pg/mL) | IL-429 (pg/mL) | IL-430 (pg/mL) | IL-431 (pg/mL) | IL-432 (pg/mL) | IL-433 (pg/mL) | IL-434 (pg/mL) | IL-435 (pg/mL) | IL-436 (pg/mL) | IL-437 (pg/mL) | IL-438 (pg/mL) | IL-439 (pg/mL) | IL-440 (pg/mL) | IL-441 (pg/mL) | IL-442 (pg/mL) | IL-443 (pg/mL) | IL-444 (pg/mL) | IL-445 (pg/mL) | IL-446 (pg/mL) | IL-447 (pg/mL) | IL-448 (pg/mL) | IL-449 (pg/mL) | IL-450 (pg/mL) | IL-451 (pg/mL) | IL-452 (pg/mL) | IL-453 (pg/mL) | IL-454 (pg/mL) | IL-455 (pg/mL) | IL-456 (pg/mL) | IL-457 (pg/mL) | IL-458 (pg/mL) | IL-459 (pg/mL) | IL-460 (pg/mL) | IL-461 (pg/mL) | IL-462 (pg/mL) | IL-463 (pg/mL) | IL-464 (pg/mL) | IL-465 (pg/mL) | IL-466 (pg/mL) | IL-467 (pg/mL) | IL-468 (pg/mL) | IL-469 (pg/mL) | IL-470 (pg/mL) | IL-471 (pg/mL) | IL-472 (pg/mL) | IL-473 (pg/mL) | IL-474 (pg/mL) | IL-475 (pg/mL) | IL-476 (pg/mL) | IL-477 (pg/mL) | IL-478 (pg/mL) | IL-479 (pg/mL) | IL-480 (pg/mL) | IL-481 (pg/mL) | IL-482 (pg/mL) | IL-483 (pg/mL) | IL-484 (pg/mL) | IL-485 (pg/mL) | IL-486 (pg/mL) | IL-487 (pg/mL) | IL-488 (pg/mL) | IL-489 (pg/mL) | IL-490 (pg/mL) | IL-491 (pg/mL) | IL-492 (pg/mL) | IL-493 (pg/mL) | IL-494 (pg/mL) | IL-495 (pg/mL) | IL-496 (pg/mL) | IL-497 (pg/mL) | IL-498 (pg/mL) | IL-499 (pg/mL) | IL-500 (pg/mL) |
|--------------|----------------|-----------------------|--------------|--------------|--------------|--------------|--------------|--------------|--------------|--------------|--------------|---------------|---------------|---------------|---------------|---------------|---------------|---------------|---------------|---------------|---------------|---------------|---------------|---------------|---------------|---------------|---------------|---------------|---------------|---------------|---------------|---------------|---------------|---------------|---------------|---------------|---------------|---------------|---------------|---------------|---------------|---------------|---------------|---------------|---------------|---------------|---------------|---------------|---------------|---------------|---------------|---------------|---------------|---------------|---------------|---------------|---------------|---------------|---------------|---------------|---------------|---------------|---------------|---------------|---------------|---------------|---------------|---------------|---------------|---------------|---------------|---------------|---------------|---------------|---------------|---------------|---------------|---------------|---------------|---------------|---------------|---------------|---------------|---------------|---------------|---------------|---------------|----------------|----------------|----------------|----------------|----------------|----------------|----------------|----------------|----------------|----------------|----------------|----------------|----------------|----------------|----------------|----------------|----------------|----------------|----------------|----------------|----------------|----------------|----------------|----------------|----------------|----------------|----------------|----------------|----------------|----------------|----------------|----------------|----------------|----------------|----------------|----------------|----------------|----------------|----------------|----------------|----------------|----------------|----------------|----------------|----------------|----------------|----------------|----------------|----------------|----------------|----------------|----------------|----------------|----------------|----------------|----------------|----------------|----------------|----------------|----------------|----------------|----------------|----------------|----------------|----------------|----------------|----------------|----------------|----------------|----------------|----------------|----------------|----------------|----------------|----------------|----------------|----------------|----------------|----------------|----------------|----------------|----------------|----------------|----------------|----------------|----------------|----------------|----------------|----------------|----------------|----------------|----------------|----------------|----------------|----------------|----------------|----------------|----------------|----------------|----------------|----------------|----------------|----------------|----------------|----------------|----------------|----------------|----------------|----------------|----------------|----------------|----------------|----------------|----------------|----------------|----------------|----------------|----------------|----------------|----------------|----------------|----------------|----------------|----------------|----------------|----------------|----------------|----------------|----------------|----------------|----------------|----------------|----------------|----------------|----------------|----------------|----------------|----------------|----------------|----------------|----------------|----------------|----------------|----------------|----------------|----------------|----------------|----------------|----------------|----------------|----------------|----------------|----------------|----------------|----------------|----------------|----------------|----------------|----------------|----------------|----------------|----------------|----------------|----------------|----------------|----------------|----------------|----------------|----------------|----------------|----------------|----------------|----------------|----------------|----------------|----------------|----------------|----------------|----------------|----------------|----------------|----------------|----------------|----------------|----------------|----------------|----------------|----------------|----------------|----------------|----------------|----------------|----------------|----------------|----------------|----------------|----------------|----------------|----------------|----------------|----------------|----------------|----------------|----------------|----------------|----------------|----------------|----------------|----------------|----------------|----------------|----------------|----------------|----------------|----------------|----------------|----------------|----------------|----------------|----------------|----------------|----------------|----------------|----------------|----------------|----------------|----------------|----------------|----------------|----------------|----------------|----------------|----------------|----------------|----------------|----------------|----------------|----------------|----------------|----------------|----------------|----------------|----------------|----------------|----------------|----------------|----------------|----------------|----------------|----------------|----------------|----------------|----------------|----------------|----------------|----------------|----------------|----------------|----------------|----------------|----------------|----------------|----------------|----------------|----------------|----------------|----------------|----------------|----------------|----------------|----------------|----------------|----------------|----------------|----------------|----------------|----------------|----------------|----------------|----------------|----------------|----------------|----------------|----------------|----------------|----------------|----------------|----------------|----------------|----------------|----------------|----------------|----------------|----------------|----------------|----------------|----------------|----------------|----------------|----------------|----------------|----------------|----------------|----------------|----------------|----------------|----------------|----------------|----------------|----------------|----------------|----------------|----------------|----------------|----------------|----------------|----------------|----------------|----------------|----------------|----------------|----------------|----------------|----------------|----------------|----------------|----------------|----------------|----------------|----------------|----------------|----------------|----------------|----------------|----------------|----------------|----------------|----------------|----------------|----------------|----------------|----------------|----------------|----------------|----------------|----------------|----------------|----------------|----------------|----------------|----------------|----------------|----------------|----------------|----------------|----------------|----------------|----------------|----------------|----------------|----------------|----------------|----------------|----------------|----------------|----------------|----------------|----------------|----------------|----------------|----------------|----------------|----------------|----------------|----------------|----------------|----------------|----------------|----------------|----------------|----------------|----------------|----------------|----------------|----------------|----------------|----------------|----------------|----------------|----------------|----------------|----------------|----------------|----------------|----------------|----------------|----------------|----------------|----------------|----------------|----------------|
| Apple pectin | 16             | 1                     | 0.00         | 0.02         | 0.48         | 0.50         | 1.0          | 46           | 28           | 1            | 7            | 0             | 3             | 177           | 0.0           | 2             | 0             | 4             | 1907          | 20            | 0             | 5             | 2.73          | 0.01          | 0             | 3.2           | 42            | 80            | 0.4           | 298           | 185           | 37            | >500          |               |               |               |               |               |               |               |               |               |               |               |               |               |               |               |               |               |               |               |               |               |               |               |               |               |               |               |               |               |               |               |               |               |               |               |               |               |               |               |               |               |               |               |               |               |               |               |               |               |               |               |               |               |               |                |                |                |                |                |                |                |                |                |                |                |                |                |                |                |                |                |                |                |                |                |                |                |                |                |                |                |                |                |                |                |                |                |                |                |                |                |                |                |                |                |                |                |                |                |                |                |                |                |                |                |                |                |                |                |                |                |                |                |                |                |                |                |                |                |                |                |                |                |                |                |                |                |                |                |                |                |                |                |                |                |                |                |                |                |                |                |                |                |                |                |                |                |                |                |                |                |                |                |                |                |                |                |                |                |                |                |                |                |                |                |                |                |                |                |                |                |                |                |                |                |                |                |                |                |                |                |                |                |                |                |                |                |                |                |                |                |                |                |                |                |                |                |                |                |                |                |                |                |                |                |                |                |                |                |                |                |                |                |                |                |                |                |                |                |                |                |                |                |                |                |                |                |                |                |                |                |                |                |                |                |                |                |                |                |                |                |                |                |                |                |                |                |                |                |                |                |                |                |                |                |                |                |                |                |                |                |                |                |                |                |                |                |                |                |                |                |                |                |                |                |                |                |                |                |                |                |                |                |                |                |                |                |                |                |                |                |                |                |                |                |                |                |                |                |                |                |                |                |                |                |                |                |                |                |                |                |                |                |                |                |                |                |                |                |                |                |                |                |                |                |                |                |                |                |                |                |                |                |                |                |                |                |                |                |                |                |                |                |                |                |                |                |                |                |                |                |                |                |                |                |                |                |                |                |                |                |                |                |                |                |                |                |                |                |                |                |                |                |                |                |                |                |                |                |                |                |                |                |                |                |                |                |                |                |                |                |                |                |                |                |                |                |                |                |                |                |                |                |                |                |                |                |                |                |                |                |                |                |                |                |                |                |                |                |                |                |                |                |                |                |                |                |                |                |                |                |                |                |                |                |                |                |                |                |                |                |                |                |                |                |                |                |                |                |                |                |                |                |                |                |
| bpRG-I       | 21             | 252                   | 0.04         | 2.08         | 4.08         | 0.79         | 5.4          | 92           | 164          | 146          | 6            | 25            | 313           | 450           | 6.4           | 76            | 25            | 1999          | 4750          | 149           | 0             | 82            | 6.20          | 0.02          | 17            | 3.2           | 90            | 239           | 5.4           | 315           | 196           | 36            | >100          |               |               |               |               |               |               |               |               |               |               |               |               |               |               |               |               |               |               |               |               |               |               |               |               |               |               |               |               |               |               |               |               |               |               |               |               |               |               |               |               |               |               |               |               |               |               |               |               |               |               |               |               |               |               |                |                |                |                |                |                |                |                |                |                |                |                |                |                |                |                |                |                |                |                |                |                |                |                |                |                |                |                |                |                |                |                |                |                |                |                |                |                |                |                |                |                |                |                |                |                |                |                |                |                |                |                |                |                |                |                |                |                |                |                |                |                |                |                |                |                |                |                |                |                |                |                |                |                |                |                |                |                |                |                |                |                |                |                |                |                |                |                |                |                |                |                |                |                |                |                |                |                |                |                |                |                |                |                |                |                |                |                |                |                |                |                |                |                |                |                |                |                |                |                |                |                |                |                |                |                |                |                |                |                |                |                |                |                |                |                |                |                |                |                |                |                |                |                |                |                |                |                |                |                |                |                |                |                |                |                |                |                |                |                |                |                |                |                |                |                |                |                |                |                |                |                |                |                |                |                |                |                |                |                |                |                |                |                |                |                |                |                |                |                |                |                |                |                |                |                |                |                |                |                |                |                |                |                |                |                |                |                |                |                |                |                |                |                |                |                |                |                |                |                |                |                |                |                |                |                |                |                |                |                |                |                |                |                |                |                |                |                |                |                |                |                |                |                |                |                |                |                |                |                |                |                |                |                |                |                |                |                |                |                |                |                |                |                |                |                |                |                |                |                |                |                |                |                |                |                |                |                |                |                |                |                |                |                |                |                |                |                |                |                |                |                |                |                |                |                |                |                |                |                |                |                |                |                |                |                |                |                |                |                |                |                |                |                |                |                |                |                |                |                |                |                |                |                |                |                |                |                |                |                |                |                |                |                |                |                |                |                |                |                |                |                |                |                |                |                |                |                |                |                |                |                |                |                |                |                |                |                |                |                |                |                |                |                |                |                |                |                |                |                |                |                |                |                |                |                |                |                |                |                |                |                |                |                |                |                |                |                |                |                |                |                |                |                |                |                |                |                |                |                |                |
| cRG-I        | 22             | 148                   | 0.02         | 1.14         | 3.51         | 0.65         | 3.7          | 75           | 159          | 160          | 21           | 23            | 284           | 317           | 3.4           | 63            | 17            | 338           | 3477          | 162           | 0             | 67            | 5.37          | 0.02          | 12            | 3.2           | 84            | 143           | 3.9           | 296           | 181           | 35            | >50           |               |               |               |               |               |               |               |               |               |               |               |               |               |               |               |               |               |               |               |               |               |               |               |               |               |               |               |               |               |               |               |               |               |               |               |               |               |               |               |               |               |               |               |               |               |               |               |               |               |               |               |               |               |               |                |                |                |                |                |                |                |                |                |                |                |                |                |                |                |                |                |                |                |                |                |                |                |                |                |                |                |                |                |                |                |                |                |                |                |                |                |                |                |                |                |                |                |                |                |                |                |                |                |                |                |                |                |                |                |                |                |                |                |                |                |                |                |                |                |                |                |                |                |                |                |                |                |                |                |                |                |                |                |                |                |                |                |                |                |                |                |                |                |                |                |                |                |                |                |                |                |                |                |                |                |                |                |                |                |                |                |                |                |                |                |                |                |                |                |                |                |                |                |                |                |                |                |                |                |                |                |                |                |                |                |                |                |                |                |                |                |                |                |                |                |                |                |                |                |                |                |                |                |                |                |                |                |                |                |                |                |                |                |                |                |                |                |                |                |                |                |                |                |                |                |                |                |                |                |                |                |                |                |                |                |                |                |                |                |                |                |                |                |                |                |                |                |                |                |                |                |                |                |                |                |                |                |                |                |                |                |                |                |                |                |                |                |                |                |                |                |                |                |                |                |                |                |                |                |                |                |                |                |                |                |                |                |                |                |                |                |                |                |                |                |                |                |                |                |                |                |                |                |                |                |                |                |                |                |                |                |                |                |                |                |                |                |                |                |                |                |                |                |                |                |                |                |                |                |                |                |                |                |                |                |                |                |                |                |                |                |                |                |                |                |                |                |                |                |                |                |                |                |                |                |                |                |                |                |                |                |                |                |                |                |                |                |                |                |                |                |                |                |                |                |                |                |                |                |                |                |                |                |                |                |                |                |                |                |                |                |                |                |                |                |                |                |                |                |                |                |                |                |                |                |                |                |                |                |                |                |                |                |                |                |                |                |                |                |                |                |                |                |                |                |                |                |                |                |                |                |                |                |                |                |                |                |                |                |                |                |                |                |                |                |                |                |                |                |                |                |                |                |                |                |
| b-glucan     | 20             | 2                     | 0.00         | 0.01         | 0.44         | 0.47         | 1.4          | 51           | 120          | 18           | 14           | 0             | 13            | 161           | 0.0           | 7             | 0             | 4             | 1730          | 85            | 0             | 19            | 2.34          | 0.00          | 0             | 3.0           | 50            | 180           | 2.8           | 271           | 169           | 32            | >10           |               |               |               |               |               |               |               |               |               |               |               |               |               |               |               |               |               |               |               |               |               |               |               |               |               |               |               |               |               |               |               |               |               |               |               |               |               |               |               |               |               |               |               |               |               |               |               |               |               |               |               |               |               |               |                |                |                |                |                |                |                |                |                |                |                |                |                |                |                |                |                |                |                |                |                |                |                |                |                |                |                |                |                |                |                |                |                |                |                |                |                |                |                |                |                |                |                |                |                |                |                |                |                |                |                |                |                |                |                |                |                |                |                |                |                |                |                |                |                |                |                |                |                |                |                |                |                |                |                |                |                |                |                |                |                |                |                |                |                |                |                |                |                |                |                |                |                |                |                |                |                |                |                |                |                |                |                |                |                |                |                |                |                |                |                |                |                |                |                |                |                |                |                |                |                |                |                |                |                |                |                |                |                |                |                |                |                |                |                |                |                |                |                |                |                |                |                |                |                |                |                |                |                |                |                |                |                |                |                |                |                |                |                |                |                |                |                |                |                |                |                |                |                |                |                |                |                |                |                |                |                |                |                |                |                |                |                |                |                |                |                |                |                |                |                |                |                |                |                |                |                |                |                |                |                |                |                |                |                |                |                |                |                |                |                |                |                |                |                |                |                |                |                |                |                |                |                |                |                |                |                |                |                |                |                |                |                |                |                |                |                |                |                |                |                |                |                |                |                |                |                |                |                |                |                |                |                |                |                |                |                |                |                |                |                |                |                |                |                |                |                |                |                |                |                |                |                |                |                |                |                |                |                |                |                |                |                |                |                |                |                |                |                |                |                |                |                |                |                |                |                |                |                |                |                |                |                |                |                |                |                |                |                |                |                |                |                |                |                |                |                |                |                |                |                |                |                |                |                |                |                |                |                |                |                |                |                |                |                |                |                |                |                |                |                |                |                |                |                |                |                |                |                |                |                |                |                |                |                |                |                |                |                |                |                |                |                |                |                |                |                |                |                |                |                |                |                |                |                |                |                |                |                |                |                |                |                |                |                |                |                |                |                |                |                |                |                |                |                |                |                |                |                |                |                |
| LPS/SEB      | 34             | 15643                 | 0.04         | 1.44         | 4.20         | 0.65         | 370          | 92           | 103          | 19           | 5            | 25            | 205           | 292           | 5.4           | 314           | 842           | 3147          | 4700          | 397           | 104           | 13380         | 5.18          | 0.06          | 9             | 3.3           | 77            | 105           | 2.5           | 278           | 179           | 34            | >5            |               |               |               |               |               |               |               |               |               |               |               |               |               |               |               |               |               |               |               |               |               |               |               |               |               |               |               |               |               |               |               |               |               |               |               |               |               |               |               |               |               |               |               |               |               |               |               |               |               |               |               |               |               |               |                |                |                |                |                |                |                |                |                |                |                |                |                |                |                |                |                |                |                |                |                |                |                |                |                |                |                |                |                |                |                |                |                |                |                |                |                |                |                |                |                |                |                |                |                |                |                |                |                |                |                |                |                |                |                |                |                |                |                |                |                |                |                |                |                |                |                |                |                |                |                |                |                |                |                |                |                |                |                |                |                |                |                |                |                |                |                |                |                |                |                |                |                |                |                |                |                |                |                |                |                |                |                |                |                |                |                |                |                |                |                |                |                |                |                |                |                |                |                |                |                |                |                |                |                |                |                |                |                |                |                |                |                |                |                |                |                |                |                |                |                |                |                |                |                |                |                |                |                |                |                |                |                |                |                |                |                |                |                |                |                |                |                |                |                |                |                |                |                |                |                |                |                |                |                |                |                |                |                |                |                |                |                |                |                |                |                |                |                |                |                |                |                |                |                |                |                |                |                |                |                |                |                |                |                |                |                |                |                |                |                |                |                |                |                |                |                |                |                |                |                |                |                |                |                |                |                |                |                |                |                |                |                |                |                |                |                |                |                |                |                |                |                |                |                |                |                |                |                |                |                |                |                |                |                |                |                |                |                |                |                |                |                |                |                |                |                |                |                |                |                |                |                |                |                |                |                |                |                |                |                |                |                |                |                |                |                |                |                |                |                |                |                |                |                |                |                |                |                |                |                |                |                |                |                |                |                |                |                |                |                |                |                |                |                |                |                |                |                |                |                |                |                |                |                |                |                |                |                |                |                |                |                |                |                |                |                |                |                |                |                |                |                |                |                |                |                |                |                |                |                |                |                |                |                |                |                |                |                |                |                |                |                |                |                |                |                |                |                |                |                |                |                |                |                |                |                |                |                |                |                |                |                |                |                |                |                |                |                |                |                |                |                |                |                |                |                |                |                |                |                |

Concentrations per mediator are indicated as average of 3 donors. Color-coded according to stimulation index (SI) vs unstimulated control (PBS) with scale on the right.

**Supplemental table S3.** Impact of bpRG-I and cRG-I on the microbiota composition at the family level (relative abundance) in batch cultures (48h) with human fecal inoculum.

| Phylum         | Family              | Inoculum | Base medium | bpRG-I | cRG-I  |
|----------------|---------------------|----------|-------------|--------|--------|
| Actinobacteria | Coriobacteriaceae   | 0.5%     | 0.5%        | 2.1%*  | 0.2%*  |
| Bacteroidetes  | Bacteroidaceae      | 29.3%*   | 44.7%       | 54.6%* | 69.2%* |
|                | Porphyromonadaceae  | 0.4%     | 0.6%        | 0.9%*  | 0.2%*  |
|                | Rikenellaceae       | 6.3%*    | 1.1%        | 1.1%   | 0.5%*  |
| Firmicutes     | Acidaminococcaceae  | 0.7%*    | 9.2%        | 10.7%  | 11.2%* |
|                | Erysipelotrichaceae | 0.3%*    | 0.1%        | 0.4%*  | 0.1%*  |
|                | Lachnospiraceae     | 33.5%*   | 18.9%       | 15.7%* | 13.6%* |
|                | Ruminococcaceae     | 28.6%*   | 3.7%        | 6.3%*  | 2.3%*  |
| Proteobacteria | Alcaligenaceae      | 0.2%*    | 2.8%        | 1.2%*  | 0.5%*  |
|                | Desulfovibrionaceae | 0%*      | 0.4%        | 0.1%*  | 0%*    |
|                | Enterobacteria      | 0%*      | 17.9%       | 6.9%*  | 2.2%*  |

Statistical differences within each family versus the base medium incubation, as calculated with a 2-sided student t-test, are indicated by an asterisk ( $p \leq 0.05$ ). Only families with abundances of at least 0.1% in one of the treatments are shown.

**Supplemental table S4.** Inclusion and exclusion criteria in proof-of-concept human study with bpRG-I.

*Inclusion criteria*

- Apparently healthy, Caucasian, males and females, aged 20–65 years at study start
- Body mass index (BMI) of 18.5 to 29.9 kg/m<sup>2</sup>
- No disorders that may interfere with the study conduct or evaluation, e.g. current or previous respiratory, cardiovascular or metabolic diseases, chronic (auto)-immune, gastrointestinal disorders, infections etc.
- Values within the normal reference range at screening of leucocytes, lymphocytes and monocytes
- No clinically relevant deviations and/or no deviations > 2 x ULN (upper limit of normal) in other laboratory values at screening
- Readiness to comply with all specific study procedures, in particular:
  - Consumption of the investigational product (IP) during the entire study
  - Maintaining the habitual diet, with the exception regarding the required dietary restrictions throughout the study to be complied with
  - Accepting the collection of fecal samples for evaluation of fecal microbiome
  - Accepting blood draws to evaluate immune response
  - Filling in health questionnaires
- Women of childbearing potential: negative pregnancy testing ( $\beta$ -HCG (beta subunit of human chorionic gonadotropin) test in urine) at screening and readiness to use reliable contraception methods for the trial duration
- Prerequisite for the participation in the study was a written informed consent by the participant following written and oral information by the investigator regarding nature, purpose, possible benefit and possible risks of the clinical study

*Exclusion criteria*

- Previously known hypersensitivity to any component of the investigational product and/or to bell pepper
- Known severe acute or chronic immunological disorders such as acquired immune deficiency syndrome (AIDS) (or human immunodeficiency virus (HIV) positive)
- Malignant disease within the last 5 years prior to screening
- Known diagnosed allergies (including any food allergy)
- Untreated or unstable hypertension (>140/90 mmHg)
- Mastopathy and/or menstrual disorders
- Any surgery or vaccination within the last 3 months prior to screening and during the study
- Intake of antibiotics, systemic corticosteroids, immune suppressants, psychotherapeutic treatment that may affect the blood count within the last 3 months prior to screening (except for nonsteroidal anti-inflammatory drugs and other potentially anti-inflammatory local analgesics  $\geq 2$  days prior to screening and during study and/or intake of any treatment and/or supplementation influencing the immune system during the study (except for nonsteroidal anti-inflammatory drugs and other potentially anti-inflammatory analgesics  $\geq 2$  days prior to study visits)
- Regular use of statins
- Reported, unexplainable weight loss or gain >2 kg in the last month before screening
- Intense sporting activities >10 h/week before screening and during the study
- Participation in night shift work or reported irregular sleep-wake pattern 2 weeks before screening and during the study
- Reported dietary restrictions such as consuming a medically prescribed diet, slimming diet or vegetarian diet in the last 3 months prior to screening or during the study
- Reported total consumption of >10 units (tablets, capsules, sachets etc.) of vitamin supplements containing  $\beta$ -carotene, vitamin C, E or zinc in the last 3 months prior to screening or any such supplementation during the study
- Reported consumption of probiotic foods or drinks in the last month prior to screening or during the study
- Reported alcohol consumption of >2 units/day (1 unit equals approximately 250 mL of beer, 100 mL of wine or 35 mL of spirits)
- Reported history of abuse of drugs or medication in the last 6 months prior to screening
- Regular consumption of tobacco
- Blood donation or transfusion in the last 2 months prior to screening or during the study
- Participation in another study in the last 2 months before screening or during the study
- Participation in the present study of a person living in the same household as the subject

- Plans to travel abroad during the period of the entire study
- Inability to comply with study procedures (e.g. due to language difficulties etc.)
- Pregnancy or lactation
- Any other reason deemed suitable for exclusion, per investigator's judgment

**Supplemental table S5.** Baseline demographic and anthropometric data of the participants.

| Parameter    | Total<br>n=57 | Placebo<br>n=20 | 0.3 g /day<br>(low dose)<br>n=19 | 1.5 g / day<br>(high dose)<br>n=18 |
|--------------|---------------|-----------------|----------------------------------|------------------------------------|
| Age          | 49.0 ± 12.0   | 48.0 ± 12.9     | 46.2 ± 13.5                      | 52.5 ± 8.2                         |
| Female (#/%) | 39/68.4%      | 14/70.0%        | 13/68.4%                         | 12/66.7%                           |
| Height (cm)  | 171.5 ± 9.1   | 171.2 ± 9.3     | 173.4 ± 9.3                      | 170.0 ± 8.8                        |
| Weight (kg)  | 70.8 ± 11.6   | 70.2 ± 11.5     | 70.9 ± 11.4                      | 71.3 ± 12.4                        |
